# Supplementary material for: Self-assembled peptides-modified flexible field-effect transistors for tyrosinase detection
Source: PubMed Central journal article supplement — iScience. 2021 Dec 22;25(1):103673. doi: 10.1016/j.isci.2021.103673 (PMC8733230; doi:10.1016/j.isci.2021.103673), 2021-12-22
Supplement: mmc1.pdf [file mmc1.pdf]

**Supplemental information**

**Self-assembled peptides-modified**

**flexible field-effect transistors**

**for tyrosinase detection**

**Huihui Ren, Tengyan Xu, Kun Liang, Jiye Li, Yu Fang, Fanfan Li, Yitong Chen, Hongyue Zhang, Dingwei Li, Yingjie Tang, Yan Wang, Chunyan Song, Huaimin Wang, and Bowen Zhu**

## Supplemental Information

### **Self-Assembled Peptides-Modified Flexible Field-Effect Transistors for Tyrosinase Detection**

Huihui Ren, Tengyan Xu, Kun Liang, Jiye Li, Yu Fang, Fanfan Li, Yitong Chen, Hongyue Zhang, Dingwei Li, Yingjie Tang, Yan Wang, Chunyan Song, Huaimin Wang,\* and Bowen Zhu\*

E-mail: [wanghuaimin@westlake.edu.cn](mailto:wanghuaimin@westlake.edu.cn); [zhubowen@westlake.edu.cn](mailto:zhubowen@westlake.edu.cn)

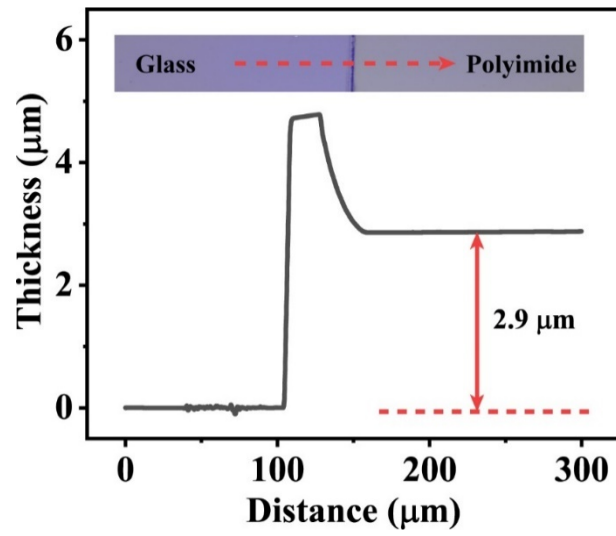

**Figure S1. Height profile of spin-coated PI film measured by surface profiler, showing a thickness of  $\sim 2.9 \mu\text{m}$ . Related to Figure 1.**

Inset shows an optical image of the sample.

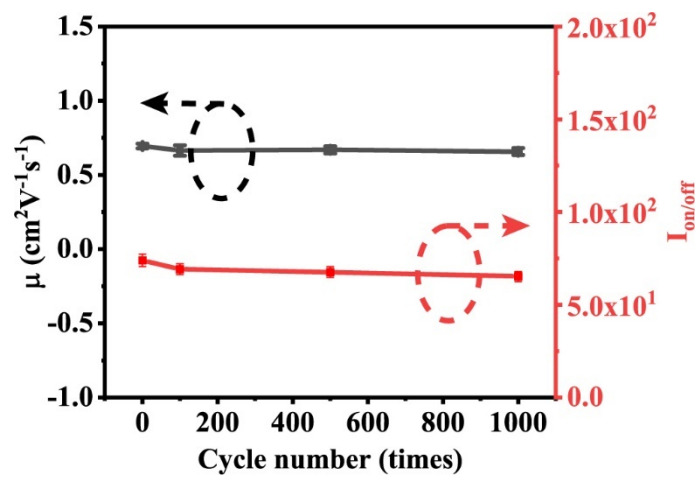

**Figure S2.** The extracted mobility ( $\mu$ ) and current on/off ratio as a function of bending cycles of the flexible bio-FETs with a bending radius of 1 cm, which shows minor performance degradation. Related to Figure 2.

Error bar stands for standard deviations of three tests.

2-chlorotrityl chloride resin  
loading: 1.1 mmol/g

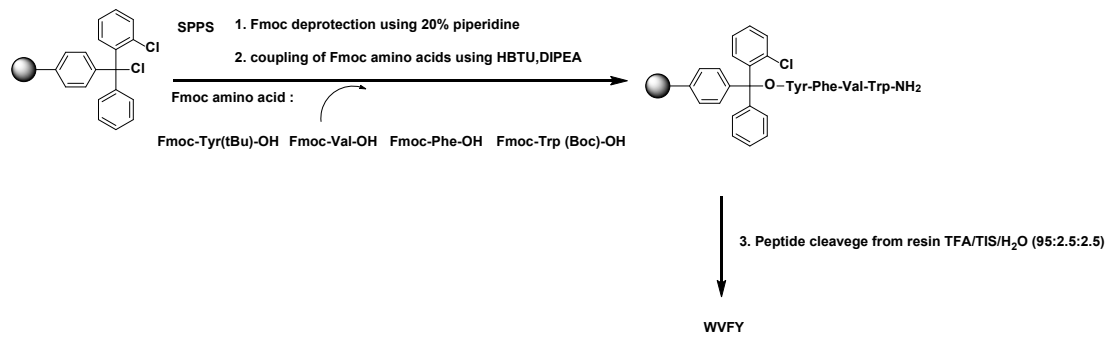

**Figure S3. Solid phase peptide synthesis (SPPS) route of WWFY peptides. Related to Figure 3.**

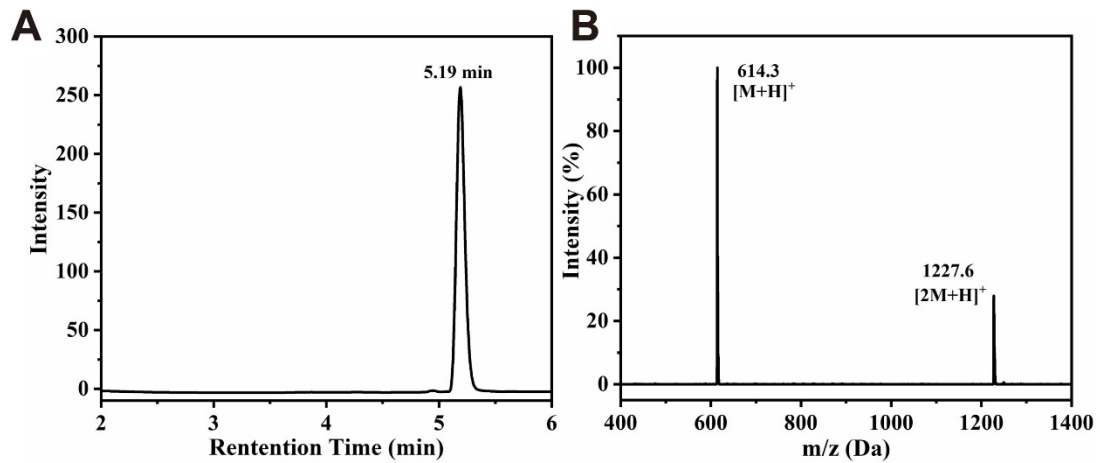

**Figure S4. LC-MS spectrum of the purified tetrapeptide WVFY. Related to Figure 3.**

The retention time is 5.19 min; the corresponding molecular weight is 613.3 g mol<sup>-1</sup>; and the purity of WVFY is higher than 96%. MS: calcd. M = 613.3, obsvd. (M+H)<sup>+</sup> = 614.3.

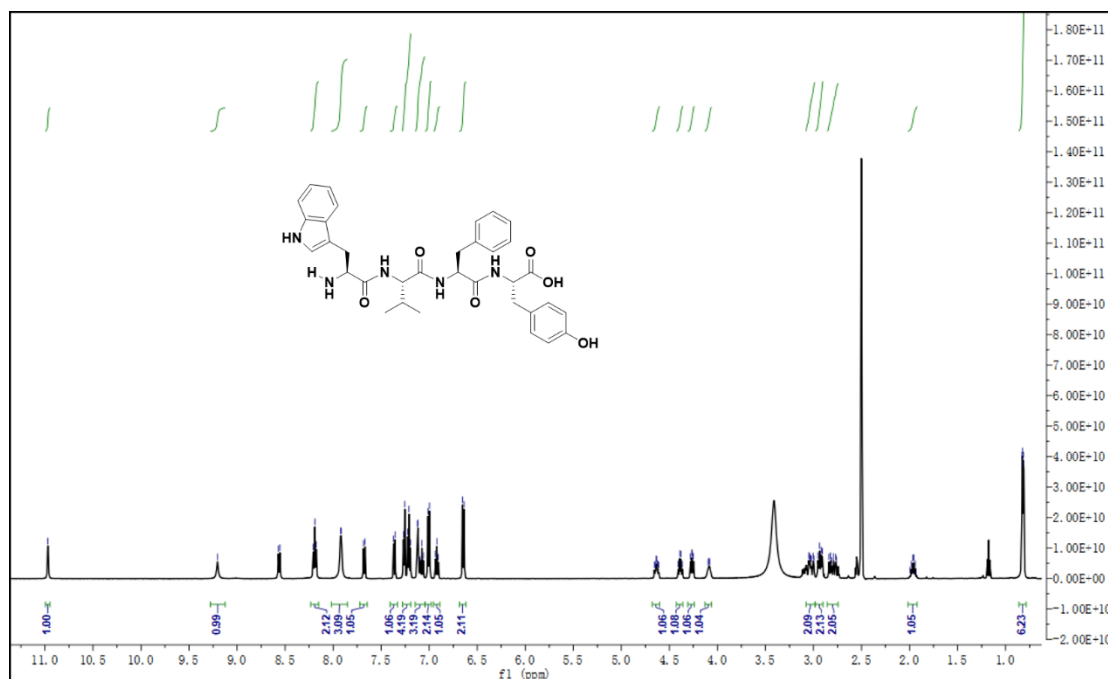

**Figure S5. <sup>1</sup>H NMR spectrum of the tetrapeptide WVFY. Related to Figure 3.**

$\delta$ 10.97 ppm (s, 1H, NH in tryptophan),  $\delta$ 9.21 ppm (s, 1H, OH in tyrosine),  $\delta$ 8.23 – 8.15 ppm (m, 2H, NH),  $\delta$ 8.02 – 7.85 ppm (m, 3H, NH),  $\delta$ 7.68 ppm (d, 1H, CH in tryptophan),  $\delta$ 7.36 ppm (d, 1H, CH in tryptophan),  $\delta$ 7.28 – 7.19 ppm (m, 4H, CH in phenylalanine/tryptophan),  $\delta$ 7.15 – 7.04 ppm (m, 3H, CH in phenylalanine),  $\delta$ 7.01 ppm (d, 2H, CH in tyrosine),  $\delta$ 6.92 ppm (t, 1H, CH in tryptophan),  $\delta$ 6.65 ppm (d, 2H, CH in tyrosine),  $\delta$ 4.63 ppm (td, 1H, CH in phenylalanine),  $\delta$ 4.43 – 4.36 ppm (m, 1H, CH in tyrosine),  $\delta$ 4.26 ppm (dd, 1H, CH in valine),  $\delta$ 4.13 – 4.06 ppm (m, 1H, CH in tryptophan),  $\delta$ 3.08 – 2.99 ppm (m, 2H, CH<sub>2</sub> in tryptophan),  $\delta$ 2.93 ppm (dd, 2H, CH<sub>2</sub> in phenylalanine),  $\delta$ 2.86 – 2.74 ppm (m, 2H, CH<sub>2</sub> in tyrosine),  $\delta$ 1.97 ppm (dt, 1H, CH in valine),  $\delta$ 0.82 ppm (dd, 6H, 2CH<sub>3</sub> in valine).

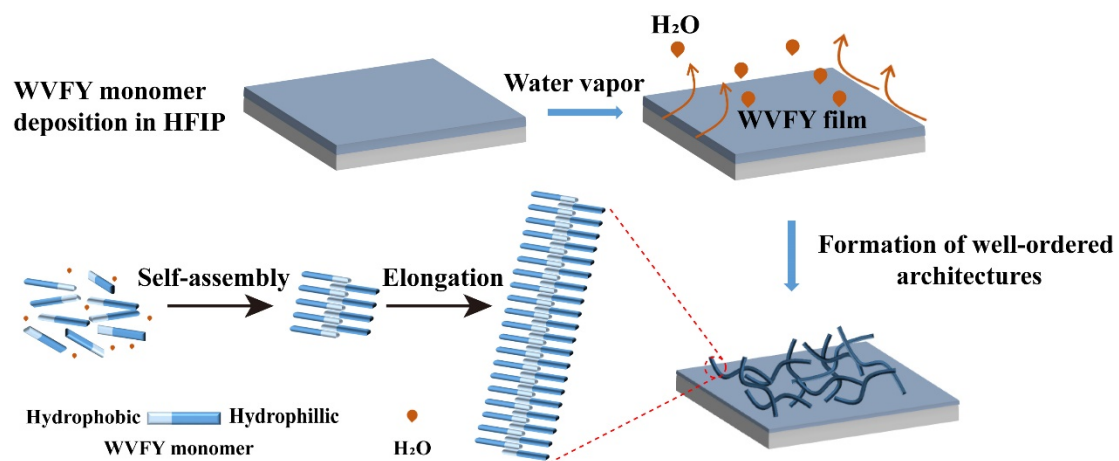

Figure S6. Schematic illustration of the self-assembly process of WVFY peptide nanostructures. Related to Figure 3.



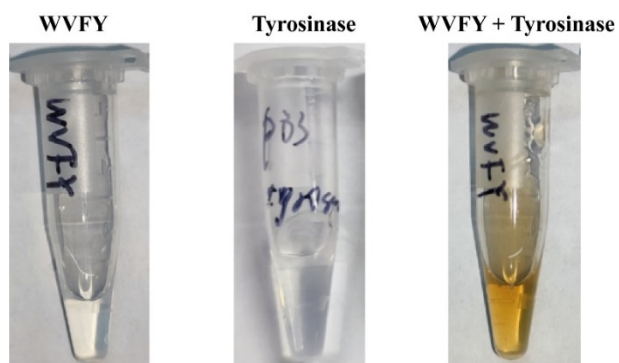

**Figure S7. Optical images of WVFY solution before and after oxidized by tyrosinase. Related to Figure 3.**

The result indicates that WVFY was transformed.

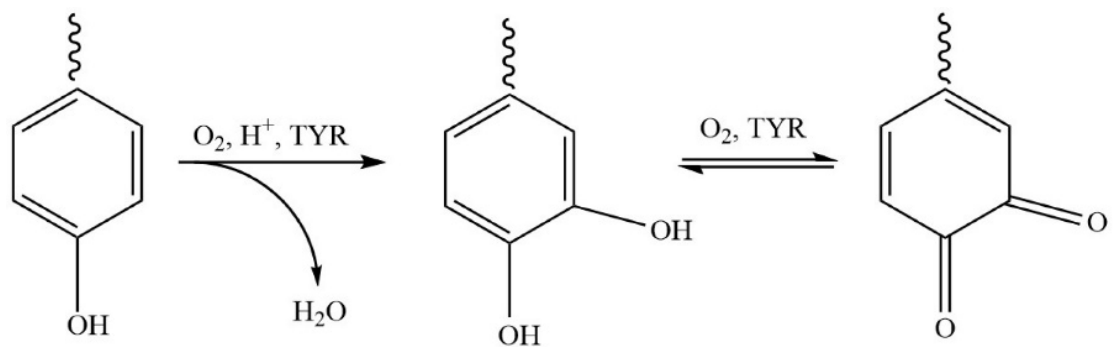

**Figure S8. Chemical reaction of WVFY with tyrosinase (TYR). Related to Figure 4.**

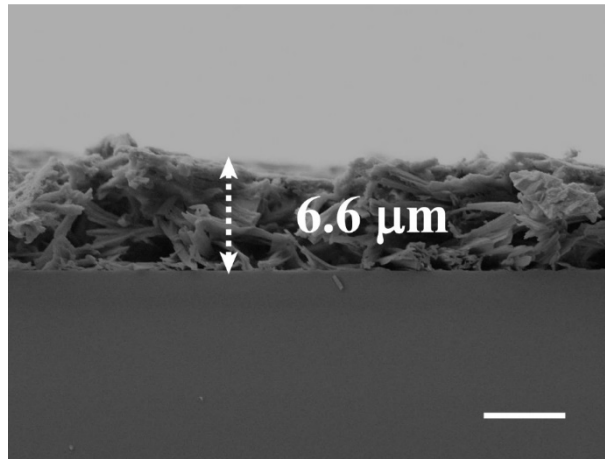

**Figure S9. Cross-sectional SEM image of self-assembled WVFY peptides nanostructures, showing a thickness of  $\sim 6.6 \mu\text{m}$ . Scale bar:  $5 \mu\text{m}$ . Related to Figure 3.**

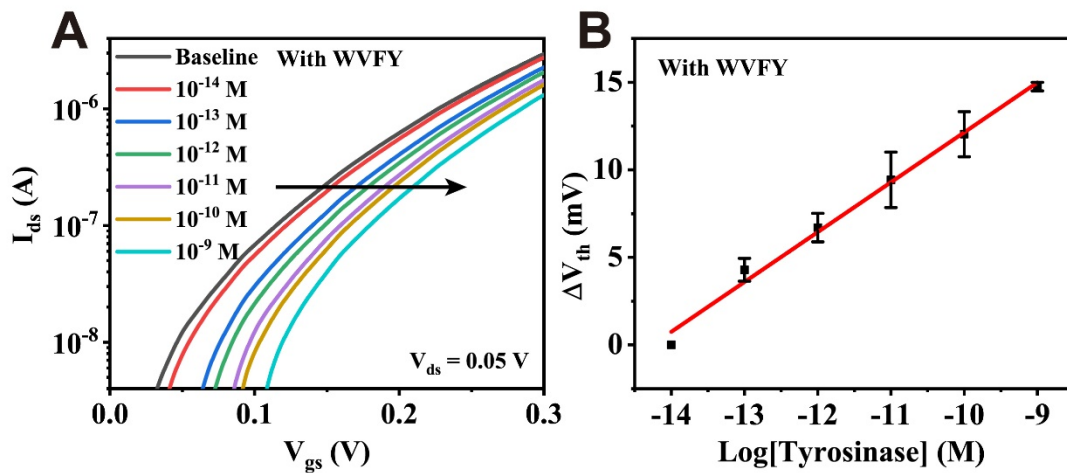

**Figure S10. Sensitivity of rigid  $\text{Al}_2\text{O}_3/\text{In}_2\text{O}_3$  bio-FETs functionalized with self-assembled WVFY peptides for tyrosinase (TYR) sensing. Related to Figure 4.**

(A) Family of typical transfer curves for the device measured in  $0.1\times$  PBS solution containing different concentrations of tyrosinase ( $C_{TYR}$ ):  $0.1\times$  PBS (black),  $10^{-14}$  M (red),  $10^{-13}$  M (deep blue),  $10^{-12}$  M (green),  $10^{-11}$  M (purple),  $10^{-10}$  M (ginger), and  $10^{-9}$  M (sky blue), showing a positive shift with the increase of  $C_{TYR}$ . (B) A corresponding linear relationship between the  $\Delta V_{th}$  and  $C_{TYR}$  in logarithmic scale. Error bar stands for standard deviations of three tests with  $p < 0.05$ .

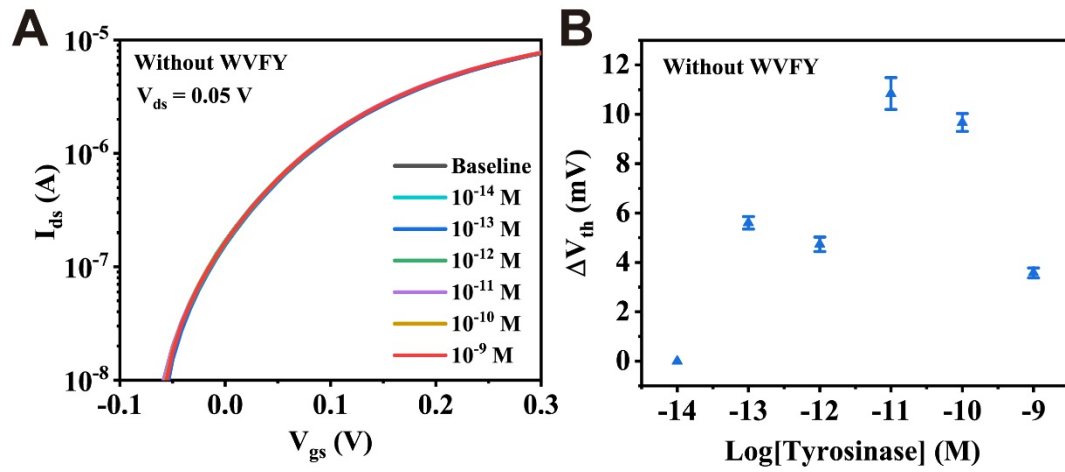

**Figure S11. Response of rigid  $\text{Al}_2\text{O}_3/\text{In}_2\text{O}_3$  bio-FETs without WVFY peptides to tyrosinase. Related to Figure 4.**

(A) Transfer characteristics of bio-FET with various  $C_{TYR}$ , indicating no obvious response. (B) The relationship between  $\Delta V_{th}$  as a function of  $C_{TYR}$ , showing a random correlation. Error bars indicate the standard deviations of three repeated tests.

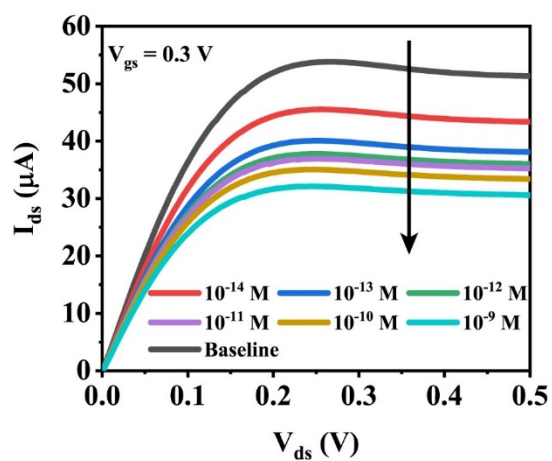

**Figure S12. Family of output curves of WVFY modified  $Al_2O_3/In_2O_3$  bio-FETs on rigid substrates with various  $C_{TYR}$ . Related to Figure 4.**

The saturation current reduced with the accumulation of tyrosinase. The gate bias was 0.3 V.

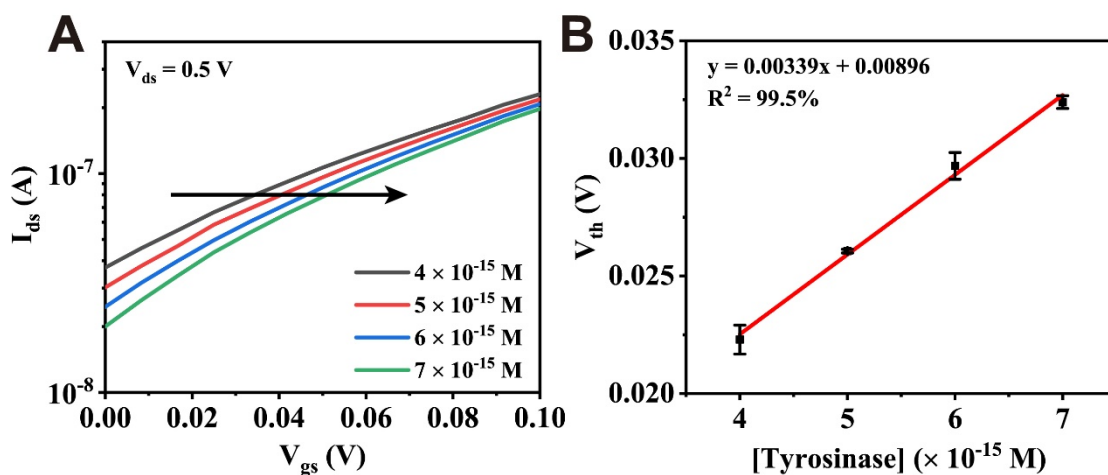

**Figure S13. Limit of detection calculation of WVFY modified  $\text{Al}_2\text{O}_3/\text{In}_2\text{O}_3$  devices. Related to Figure 4.**

(A) Typical transfer curves for tyrosinase sensing in a very low concentration regime from  $4 \times 10^{-15}$  to  $7 \times 10^{-15}$  M. (B) The  $V_{th}$  shift as a function of  $C_{TYR}$  in logarithmic scale, demonstrating a linear equation of  $y = 0.00339x + 0.00896$  with the  $R^2$  of 99.5%. Error bars indicate the standard deviations of three repeated tests with  $p < 0.05$ .

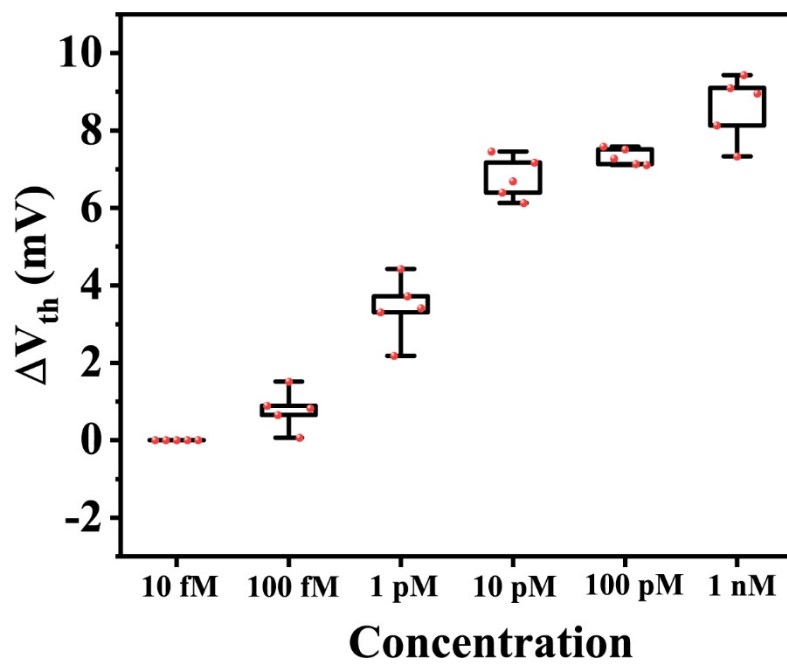

**Figure S14.** The threshold voltage shift ( $\Delta V_{th}$ ) as a function of tyrosinase concentration in PBS solution measured by WVFY modified bio-FETs. Related to Figure 4. Error bars indicate the difference of five repeated tests.



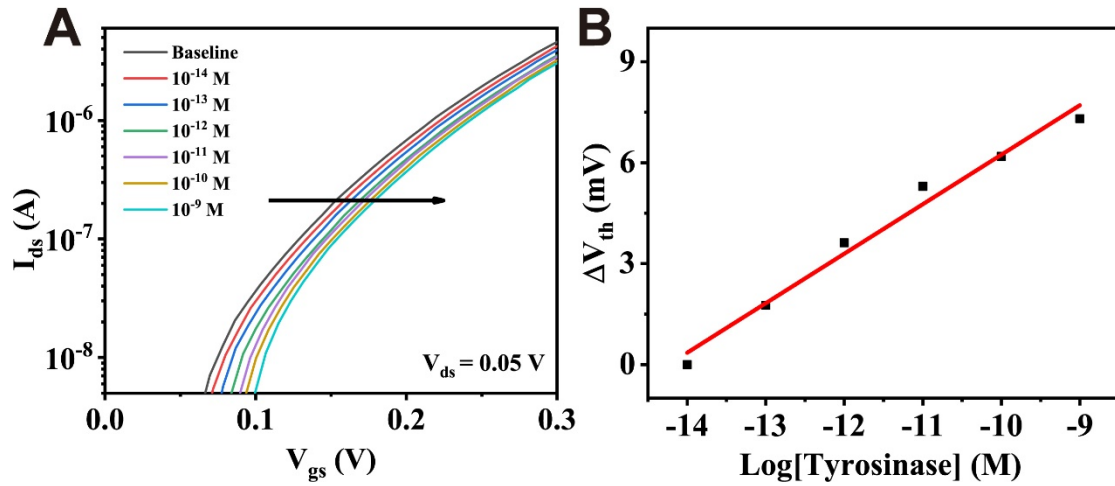

**Figure S15. Sensitivity of WVFY peptide modified bio-FETs after one week storage in air. Related to Figure 4.**

(A) Transfer characteristics for the WVFY modified device measured in various tyrosinase concentration ( $C_{TYR}$ ):  $0.1 \times$  PBS (black),  $10^{-14}$  M (red),  $10^{-13}$  M (deep blue),  $10^{-12}$  M (green),  $10^{-11}$  M (purple),  $10^{-10}$  M (ginger), and  $10^{-9}$  M (sky blue), when the bio-FET stored in air environment for one week. The  $V_{th}$  shifted positively with increased  $C_{TYR}$  and optimal detection range of 10 fM to 1 nM toward tyrosinase sensing. (B) A corresponding linear relationship between  $\Delta V_{th}$  as a function of  $C_{TYR}$ .

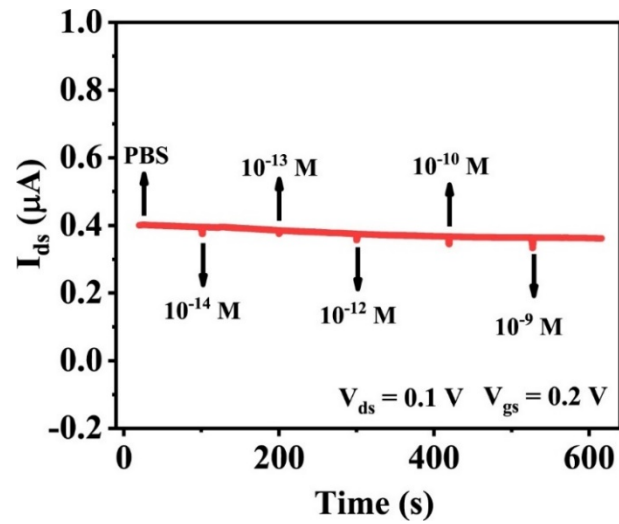

Figure S16. Real-time sensing response of  $\text{Al}_2\text{O}_3/\text{In}_2\text{O}_3$  bio-FET without WVFY to tyrosinase in  $0.1\times$  PBS solution, showing no significant current fluctuations. Related to Figure 4.

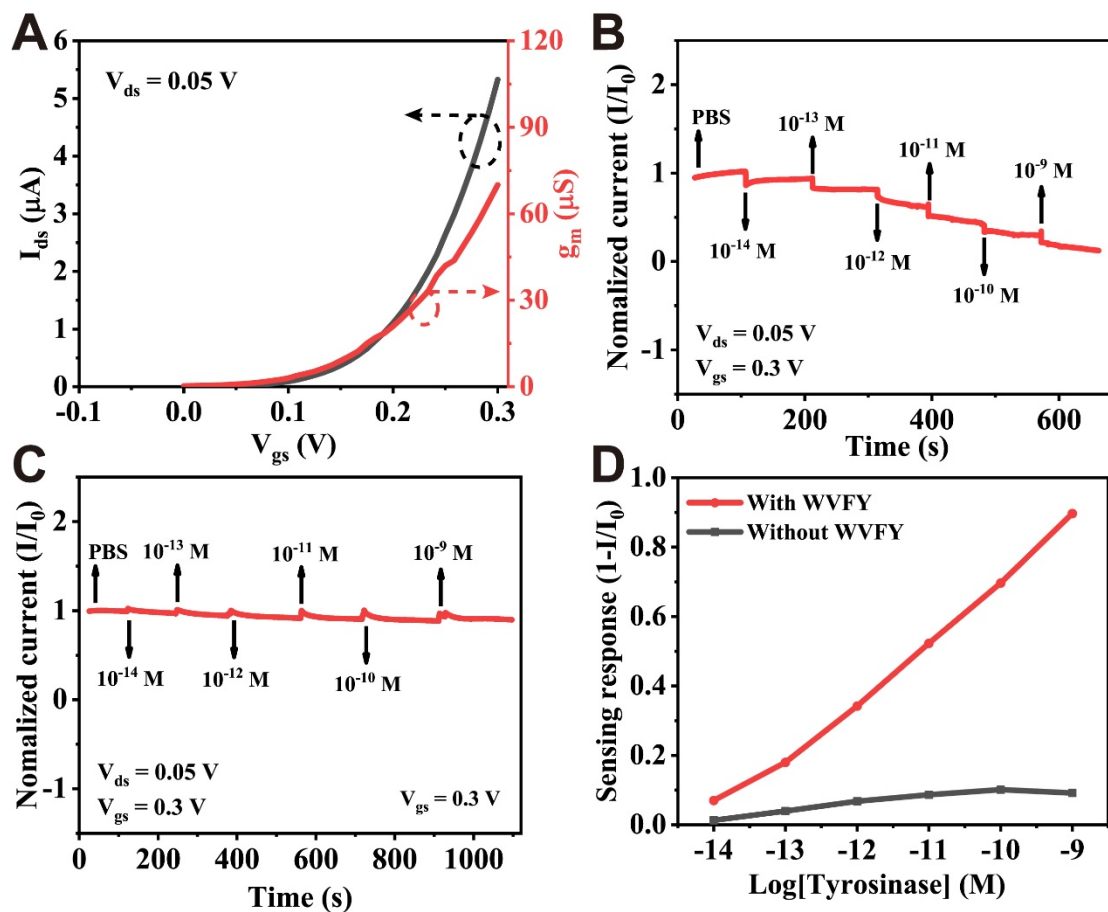

**Figure S17. Detection of tyrosinase using nanostructured WVFY peptide modified bio-FETs. Related to Figure 4.**

(A) Transfer curve and transconductance characteristics in linear scale when the  $V_{ds}$  was fixed at 0.05 V. (b-c) Real-time sensing response of  $Al_2O_3/In_2O_3$  bio-FET with (B) and without (C) WVFY modification when exposed to various concentration of tyrosinase. The drain and gate voltage ( $V_{ds}$  and  $V_{gs}$ ) were 0.05 and 0.3 V, respectively. (D) Sensing response ( $1 - I/I_0$ ) as a function of tyrosinase concentration in logarithm scale.

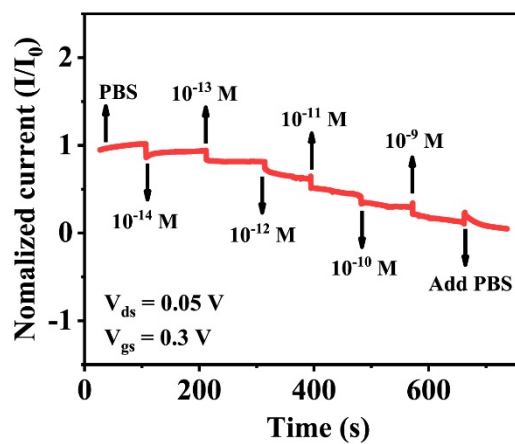

**Figure S18. Real-time sensing response of WVFY modified bio-FET with tyrosinase. Related to Figure 4.**

PBS solution was injected (at ~660 s) to dilute the tyrosinase concentration from  $1 \times 10^{-9}$  to  $1 \times 10^{-10}$  M. The figure is extended from Figure S17B.

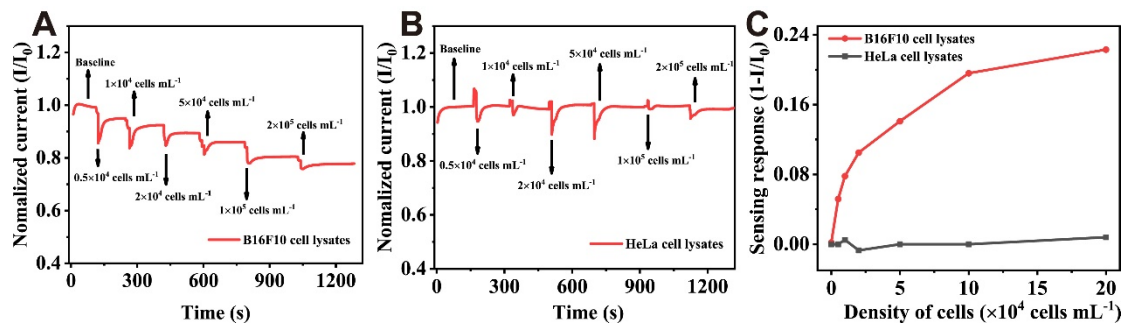

**Figure S19. Tyrosinase screening in cell lysates using WVFY modified bio-FETs. Related to Figure 4.**

Real-time sensing response curves obtained at bio-FET with (A) B16F10 cell lysates and (B) HeLa cell lysates. (C) Relationships between the sensing response ( $1 - I/I_0$ ) and density of cells.

**Table S1. Comparison of electrical characteristics of flexible bio-FETs before and after being transferred onto soft PDMS substrates. Related to Figure 1.**

|                        | $V_{th}$ (V) | $I_{on/off}$      | $\mu$ (cm <sup>2</sup> V <sup>-1</sup> s <sup>-1</sup> ) | $SS$ (mV dec <sup>-1</sup> ) |
|------------------------|--------------|-------------------|----------------------------------------------------------|------------------------------|
| <b>Before transfer</b> | 0.362        | $9.5 \times 10^1$ | 0.865                                                    | 70.6                         |
| <b>On PDMS</b>         | 0.365        | $8.8 \times 10^1$ | 0.839                                                    | 73.1                         |

**Table S2. Comparison of performance between the presented bio-FET and other previous method on tyrosinase sensing. Related to Figure 4.**

| Method                                     | Materials                                                                       | Linear range                                                        | LOD                                                    | Ref.                  |
|--------------------------------------------|---------------------------------------------------------------------------------|---------------------------------------------------------------------|--------------------------------------------------------|-----------------------|
| Fluorescence                               | Resorufin/ <i>m</i> -tolylboronic acid pinacol ester                            | 1 - 100 U mL <sup>-1</sup>                                          | 0.5 U mL <sup>-1</sup>                                 | (Li et al., 2018)     |
| Microneedle electrochemical sensor         | Catechol/agarose                                                                | 0 - 0.5 mg mL <sup>-1</sup>                                         | -                                                      | (Ciui et al., 2018)   |
| SERS                                       | ITO/AuNPs/p-TC                                                                  | 0.1 - 100 U mL <sup>-1</sup>                                        | 0.07 U mL <sup>-1</sup>                                | (Wang et al., 2019)   |
| Colorimetry                                | KA/AgNPs                                                                        | 0.5 - 4 U mL <sup>-1</sup>                                          | 0.117 U mL <sup>-1</sup>                               | (Liu et al., 2017)    |
| Electrocatalysis                           | [(PSS/PPy)(P <sub>2</sub> Mo <sub>18</sub> /PPy) <sub>5</sub> ]                 | 3.66 - 26.87 U mL <sup>-1</sup>                                     | 0.0021 U mL <sup>-1</sup>                              | (Ding et al., 2021)   |
| Fluorescence                               | Morpholine/4-aminophenol                                                        | 0.5 - 60 U mL <sup>-1</sup>                                         | 0.007 U mL <sup>-1</sup>                               | (Zhou et al., 2016)   |
| Spectrophotometry                          | Boronic acid/AuNPs                                                              | 10 <sup>-10</sup> - 10 <sup>-8</sup> U mL <sup>-1</sup>             | 10 <sup>-10</sup> U mL <sup>-1</sup>                   | (Li et al., 2012)     |
| Molecularly imprinted polymer-based sensor | Scopoletin/o-phenylenediamine                                                   | -                                                                   | 3.97 nM                                                | (Yarman et al., 2018) |
| Photofuel cell-based self-powered sensor   | g-C <sub>3</sub> N <sub>4</sub> -Bi <sub>2</sub> S <sub>3</sub> /hemin-graphene | 0.01 - 5 U mL <sup>-1</sup>                                         | 0.005 U mL <sup>-1</sup>                               | (Yan et al., 2019)    |
| Field-Effect Transistors                   | WVFY/Al <sub>2</sub> O <sub>3</sub> /In <sub>2</sub> O <sub>3</sub>             | 10 fM - 1 nM<br>(1.3 × 10 <sup>-6</sup> - 0.13 U mL <sup>-1</sup> ) | 1.9 fM<br>(2.5 × 10 <sup>-7</sup> U mL <sup>-1</sup> ) | This work             |
